# Supplementary material for: Interdependence of phosphorus-31–selenium-77 NMR coupling constants in bicyclic phosphorus selenide compounds†
Source: Royal Society of Chemistry journal article supplement (doi:10.1039/b010068o), 2001-01-01
Supplement: table1.doc [file table1.doc]

**Supplementary Table 1.** *Ab Initio* Geometries for ‑P4Se3(CN)2 or ‑P4Se3(CN)I

------------------------------------------------------------------------------------------

Compound: *exo,exo-*‑P4Se3(CN)2 *endo,exo-*‑P4Se3(CN)2 *exo,exo-*‑P4Se3(CN)I

Scheme: **2 4 2**

------------------------- ------------------------ ------

Geometry optimised at: *a* RHF/ DF/ DF/ RHF/ DF/ DF/ RHF/

3-21G* SVP TZV 3-21G* SVP TZV 3-21G*

------------------------------------------------------------------------------------------

Bond lengths (Å)

PC–Sea 2.229 2.252 2.254 2.247 2.278 2.278 2.228

PC–PD 2.199 2.225 2.228 2.193 2.222 2.228 2.197

PC–Seb 2.254 2.279 2.279 2.248 2.262 2.264 2.257

PA–Sea 2.229 2.252 2.254 2.225 2.244 2.246 2.229

PA–PB 2.199 2.225 2.228 2.211 2.248 2.252 2.198

PA–Sed 2.254 2.279 2.279 2.247 2.266 2.268 2.250

PB–Seb 2.263 2.297 2.299 2.290 2.329 2.326 2.262

PB–Cb 1.778 1.790 1.793 1.774 1.783 1.786 1.779

PD–Sed 2.263 2.297 2.299 2.260 2.296 2.299 2.264

PD–Cd 1.778 1.790 1.793 1.779 1.790 1.793

Cb–Nb 1.142 1.161 1.154 1.142 1.161 1.154 1.142

Cd–Nd 1.142 1.161 1.154 1.142 1.161 1.154

PD–Id 2.478

Bond angles ()

PC–Sea–PA 97.13 97.47 97.55 96.79 96.89 97.06 96.96

Sea–PC–PD 101.71 102.59 102.76 101.73 102.47 102.51 103.04

Sea–PC–Seb 104.58 104.20 103.86 103.90 103.14 102.68 104.18

PD–PC–Seb 95.98 95.14 95.43 98.06 98.88 99.38 95.52

Sea–PA–PB 101.71 102.59 102.76 95.46 96.34 96.46 101.75

Sea–PA–Sed 104.58 104.20 103.86 104.54 104.11 103.73 104.40

PB–PA–Sed 95.98 95.14 95.43 105.11 106.00 106.39 96.32

PA–PB–Seb 104.72 104.43 104.49 104.34 104.05 104.28 104.58

PA–PB–Cb 97.16 96.55 96.20 98.10 96.35 96.40 97.09

Seb–PB–Cb 100.39 99.88 99.50 100.30 100.98 100.93 100.39

PA–Sed–PD 102.80 103.26 103.38 103.01 103.21 103.27 103.50

PC–PD–Sed 104.72 104.43 104.49 104.87 104.73 104.78 104.11

PC–PD–Cd 97.16 96.55 96.20 96.79 95.89 95.37

Sed–PD–Cd 100.39 99.88 99.50 100.69 99.97 99.64

PC–Seb–PB 102.80 103.26 103.38 100.66 101.50 101.77 102.89

PB–Cb–Nb 177.36 174.90 175.01 176.77 173.64 173.59 177.33

PD–Cd–Nd 177.36 174.90 175.01 177.49 175.19 175.29

PC–PD–Id 98.71

Sed–PD–Id 103.26

Selected torsion angles ()

PA–Sea–PC–PD 52.67 51.68 51.33 52.38 51.30 51.00 51.67

PA–Sea–PC–Seb ‑46.76 ‑47.02 ‑47.64 ‑49.10 ‑51.05 ‑51.77 ‑47.55

PC–Sea–PA–PB 52.67 51.68 51.33 59.92 59.60 59.33 53.10

PC–Sea–PA–Sed ‑46.76 ‑47.02 ‑47.64 ‑47.26 ‑48.70 ‑49.33 ‑46.66

Sea–PC–PD–Cd 63.35 65.01 65.82 64.59 67.08 67.78

PD–PC–Seb–PB ‑80.30 ‑79.19 ‑78.03 ‑86.68 ‑84.10 ‑82.81 ‑80.46

Sea–PA–PB–Cb 63.35 65.01 65.82 ‑153.49 ‑150.58 ‑149.29 63.62

PB–PA–Sed–PD ‑80.30 ‑79.19 ‑78.03 ‑75.08 ‑72.64 ‑71.52 ‑78.87

PA–PB–Seb–PC 9.74 7.16 5.54 20.51 16.33 14.70 8.91

PA–PB–Cb–Nb 128.51 121.07 120.32 ‑132.68 ‑131.44 ‑131.82 128.29

Seb–PB–Cb–Nb ‑125.03 ‑132.98 ‑133.81 121.05 122.87 122.26 ‑125.41

PA–Sed–PD–PC 9.74 7.16 5.54 8.57 4.37 2.87 7.40

PC–PD–Cd–Nd 128.51 121.07 120.32 127.81 119.86 118.86

Sed–PD–Cd–Nd ‑125.03 ‑132.98 ‑133.81 ‑125.61 ‑134.02 ‑135.13

Sea–PC–PD–Id 68.83

*a* DF = MPW1PW91; SVP = Ahlrichs SVP; TZV = Ahlrichs TZV with single *d* polarisation functions added.

------------------------------------------------------------------------------------------
