# Supplementary material for: Interdependence of phosphorus-31–selenium-77 NMR coupling constants in bicyclic phosphorus selenide compounds†
Source: Royal Society of Chemistry journal article supplement (doi:10.1039/b010068o), 2001-01-01
Supplement: table2.doc [file table2.doc]

**Supplementary Table 2.** *Ab Initio* Energies for ‑P4Se3(CN)2 or ‑P4Se3(CN)I

-----------------------------------------------------------------------------------------------

Compound: *exo,exo-*‑P4Se3(CN)2 *endo,exo-*‑P4Se3(CN)2 *exo,exo-*‑P4Se3(CN)I

Scheme: **2 4 2**

------------------------------- ------------------------------- ----------

Geometry RHF/ DF/ DF/ RHF/ DF/ DF/ RHF/

optimised at: *a* 3-21G* SVP TZV 3-21G* SVP TZV 3-21G*

-----------------------------------------------------------------------------------------------

Electronic *b,d* ‑8706.178040 ‑8754.983931 ‑8756.503577 ‑8706.169873 ‑8754.976474 ‑8756.496470 ‑15502.313741

Rel. Electronic *c* 0 0 0 21443 19581 18661

Thermal *c,e* 116612 109855 109545 116508 109755 109449 92797

Rel. Thermal *c* 0 0 0 ‑105 ‑100 ‑96

Elect.+Thermal *b* ‑8706.133625 ‑8754.942090 ‑8756.461854 ‑8706.125497 ‑8754.934671 ‑8756.454783 ‑15502.278396

Rel. Elect.+thermal *c* 0 0 0 21339 19480 18565

*a* DF = MPW1PW91; SVP = Ahlrichs SVP; TZV = Ahlrichs TZV with single *d* polarisation functions added. *b* In Hartree units per molecule. *c* In J mol-1. *d* RHF or RmPW+HF-PW91 energy, for gas-phase structures. *e* Thermal energy is vibrational energy at 298.15 K, including zero‑point energy, plus 3 *kT* rotational and translational energy, as reported by Gaussian 98.

-----------------------------------------------------------------------------------------------
